# Supplementary material for: Can we measure beauty? Computational evaluation of coral reef aesthetics
Source: PeerJ journal article supplement (doi:10.7717/peerj.1390), 2015-11-10
Supplement: FigureS1.pdf [file FigureS1.pdf]

# Relative Importance

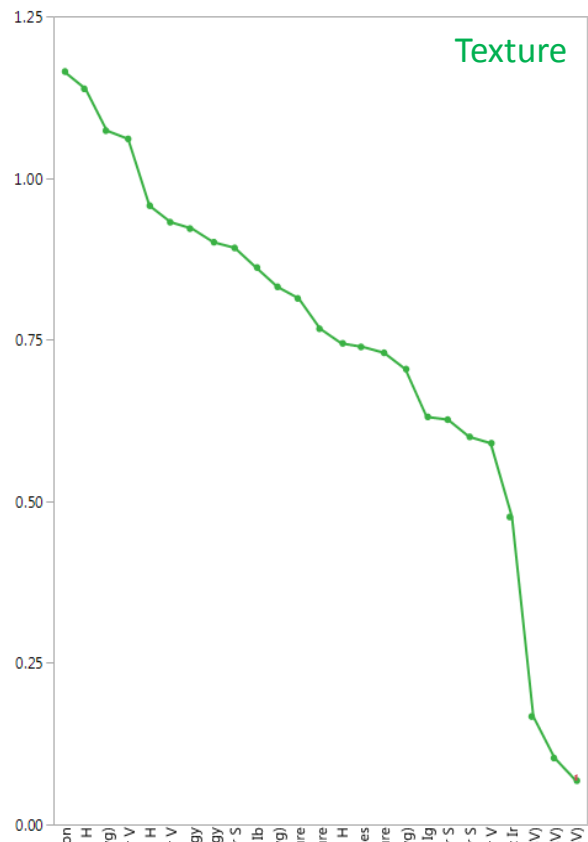

## Texture

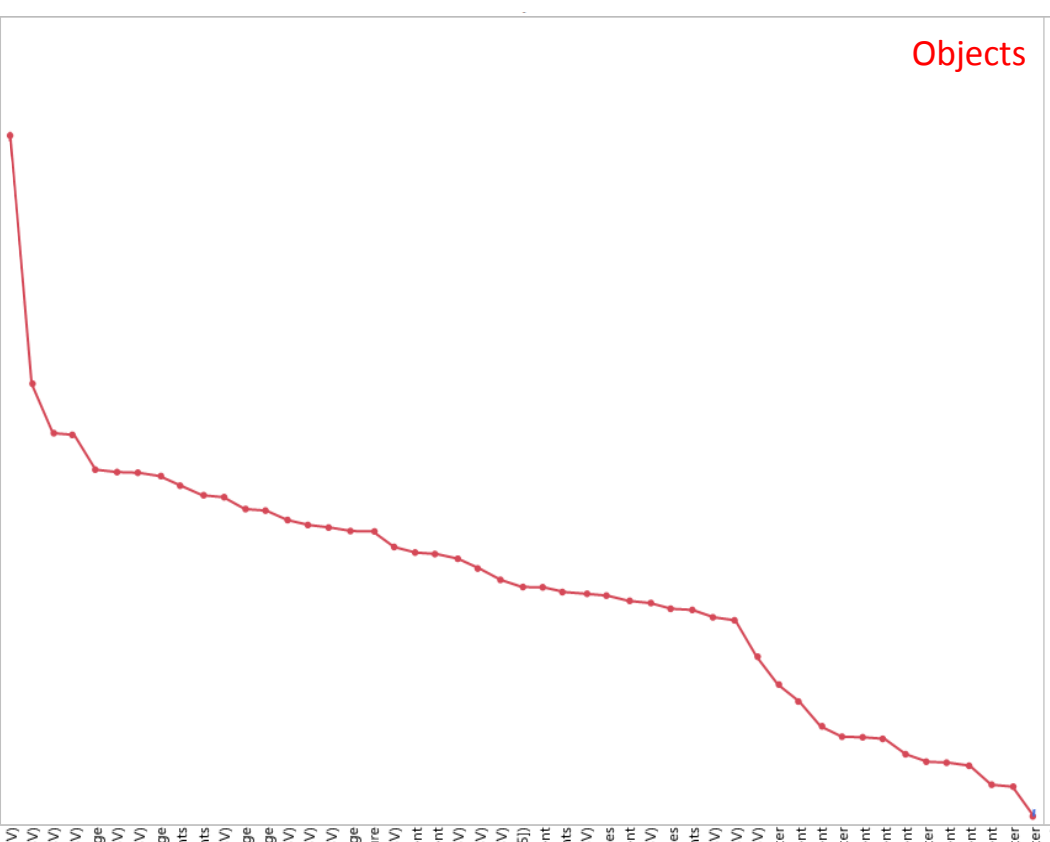

## Objects

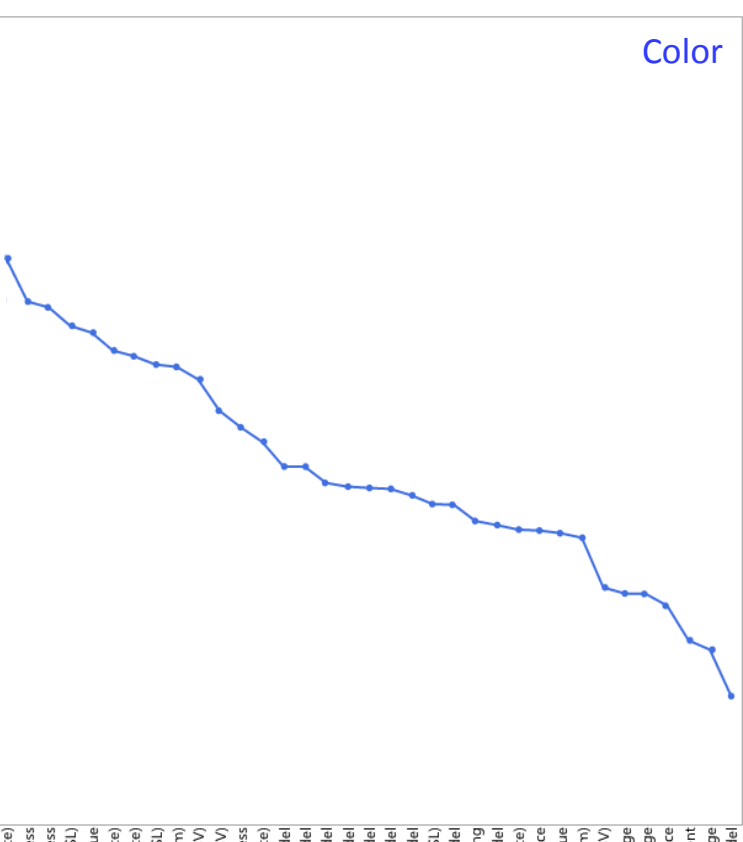

## Color
